# Supplementary material
Source: PubMed Central journal article supplement (PMC10334690)
Supplement: NIHMS1904919-supplement-1.pdf [file NIHMS1904919-supplement-1.pdf]

## Primary supplemental PDF

### Supplemental tables

| Chemical name           | Example ant taxa using the compound as alarm pheromone                                                                                                                                             | Major behavior in <i>O. biroi</i> (Fig. 1E) | Extracted from <i>O. biroi</i> ? [S1] |
|-------------------------|----------------------------------------------------------------------------------------------------------------------------------------------------------------------------------------------------|---------------------------------------------|---------------------------------------|
| 4-methyl-3-heptanone    | <i>Atta texana</i> [S2]; <i>Pogonomyrmex</i> sp. [S3]; <i>Neoponera villosa</i> [S4]; Myrmicinae subfamily [S5]; <i>Atta</i> sp. [S6]; <i>Eciton burchellii</i> & <i>E. hamatum</i> [S7]           | Immediate panic alarm                       | Yes                                   |
| 4-methyl-3-heptanol     | <i>Pogonomyrmex barbatus</i> [S8]; <i>Atta sexdens</i> [S9]; Dolichoderinae subfamily [S10]; <i>Harpegnathos saltator</i> [S11]                                                                    | Immediate panic alarm                       | Yes                                   |
| 4-methyl-3-hexanol      | <i>Tetramorium impurum</i> [S12-14]                                                                                                                                                                | Immediate panic alarm                       | No                                    |
| 6-methyl-5-hepten-2-one | <i>Formica</i> sp. [S15]; <i>Iridomyrmex purpureus</i> [S16]; <i>Aenictus rotundatus</i> [S17]; <i>Eciton burchellii</i> [S18]; <i>Pogonomyrmex barbatus</i> [S8]; <i>Lasius fuliginosus</i> [S19] | Ants leave nest                             | No                                    |

**Table S1. Background information on the four ant alarm pheromones used in this study, related to Fig. 1.**

| <b>Šidák's multiple comparisons test</b>                          | <b>Mean diff.</b> | <b>95% CI of diff.</b> | <b>Adjusted P value</b> |
|-------------------------------------------------------------------|-------------------|------------------------|-------------------------|
| 4-methyl-3-hexanol (n=10) vs.<br>4-methyl-3-heptanone (n=17)      | -2.049            | -22.87 to 18.78        | >0.99 (ns)              |
| 4-methyl-3-hexanol (n=10) vs.<br>4-methyl-3-heptanol (n=11)       | 7.805             | -15.03 to 30.64        | 0.97 (ns)               |
| 4-methyl-3-hexanol (n=10) vs. blend (n=9)                         | 8.724             | -15.29 to 32.73        | 0.96 (ns)               |
| 6-methyl-5-hepten-2-one (n=10) vs.<br>4-methyl-3-heptanone (n=17) | 20.92             | 0.096 to 41.75         | 0.048 (*)               |
| 6-methyl-5-hepten-2-one (n=10) vs.<br>4-methyl-3-heptanol (n=11)  | 30.77             | 7.94 to 53.61          | 0.0025 (**)             |
| 6-methyl-5-hepten-2-one (n=10) vs. blend (n=9)                    | 31.69             | 7.69 to 55.70          | 0.0032 (**)             |
| vehicle control (n=8) vs.<br>4-methyl-3-heptanone (n=17)          | 78.87             | 56.47 to 101.3         | <0.0001 (****)          |
| vehicle control (n=8) vs.<br>4-methyl-3-heptanol (n=11)           | 88.72             | 64.44 to 113.0         | <0.0001 (****)          |
| vehicle control (n=8) vs. blend (n=9)                             | 89.4              | 64.25 to 115.0         | <0.0001 (****)          |

**Table S2. Statistical comparisons of behavioral effects, related to Fig. 1F.** Detailed statistical comparisons for the effects of alarm pheromones on the length of time that the original nest pile remained intact in the alarm behavior colony bioassay.

| Odorant                 | Category            | Generated robust AL responses? | Vapor pressure (mmHg) at RT |
|-------------------------|---------------------|--------------------------------|-----------------------------|
| ethanol                 | General odorant     | Yes                            | 40                          |
| isopropanol             | General odorant     | Yes                            | 33                          |
| 3-hexanone              | General odorant     | Yes                            | 13.9                        |
| 4-methyl-3-heptanone    | Ant alarm pheromone | Yes                            | 5.03 (predicted)            |
| propionic acid          | General odorant     | Yes                            | 2.9                         |
| 6-methyl-5-hepten-2-one | Ant alarm pheromone | Yes                            | 1.78 (predicted)            |
| ethylpyrazine           | General odorant     | Yes                            | 1.67                        |
| 4-methyl-3-hexanol      | Ant alarm pheromone | Yes                            | 1.55 (predicted)            |
| 4-methyl-3-heptanol     | Ant alarm pheromone | Yes                            | 0.43 (predicted)            |
| butyric acid            | General odorant     | No                             | 0.43                        |
| undecane                | Ant alarm pheromone | No                             | 0.41                        |
| linalool                | General odorant     | No                             | 0.16                        |
| terpineol               | General odorant     | No                             | 0.04                        |
| (+)-valencene           | General odorant     | No                             | 0.033 (predicted)           |
| geranyl acetate         | General odorant     | No                             | 0.02                        |
| dodecyl acetate         | General odorant     | No                             | 0.00047                     |

**Table S3. Vapor pressures of odorant stimuli, related to Figs. 3-4.** Odors are listed according to vapor pressure in descending order. Vapor pressure values were obtained from the PubChem database (National Institute for Biotechnology Information: <https://pubchem.ncbi.nlm.nih.gov>). For records with missing values from PubChem, predicted values are given instead, generated from EPISuite [S20] and obtained from the ChemSpider database (Royal Society for Chemistry: <https://www.chemspider.com>).

| Oligonucleotide name | Sequence 5'-3'                                                                    |
|----------------------|-----------------------------------------------------------------------------------|
| Orco_F               | tagttggtttgtttgcacaTATGTCACGTAATCAGCTTTTGACG                                      |
| Orco_R               | gcgcttgggtggcatgttgcaTCATATGTCTGCGAGCAAATGGAACG                                   |
| ie1-A_F              | ttatcgaattcctgcagcccggggatccaACTAGTTGTTTCGCCGAGCTCTTACG<br>CGC                    |
| ie1-A_R              | ctcggaggaggccatCCGCGGCGAACAGGTCACTTGGTTGTTACGATC<br>TTG                           |
| DsRed_F              | acctgtcgcgcggATGGCCTCCTCCGAGAA                                                    |
| DsRed_R              | ttatatatatatatttctgttatagatGGCGCGCCGAACACATATGCGAACAA<br>CAAACCACA ACTAGAATGCAGTG |
| QF2_F                | aaccaagtgacctgttcgggcccggACATATGCAACATGCCACCCAA                                   |
| QF2_R                | accagtgcacgtgaccgCGAGCGCTGGATCTAAACGAGTTTTTAAGC                                   |
| 15xQUAS_F            | cgtcacgtgcact                                                                     |
| 15xQUAS_R            | tgagaacctcgaacaagcGTTTAAACAGATCTGTTAACGAATTGATC                                   |
| GCaMP6s_F            | gggcccgcctgttcgAGCGCTTGTTCGATGGGTTCATCATCATC                                      |
| GCaMP6s_R            | atatatttctgttatagatggCGCGCCGTAGCCCTAAGATACATTGATGAGT<br>TTG                       |
| Ie1-B_F              | ctgcattctagtgtgtttgtttgcgaCATATGTGTTTCGCCGAGCTCTTACGCG                            |
| Ie1-B_R              | catcgaacaagcgtcgaacaggccggcccGAACAGGTCACTTGGTTGTTAC                               |

**Table S4. Oligonucleotides used in plasmid construction, related to STAR Methods.** Gibson homology regions are shown as lowercase letters. The labels “F” and “R” denote forward and reverse orientation of oligonucleotides for a given target locus, respectively. All primers were designed for this study and purchased from Integrated DNA Technologies, Coralville, IA, USA.

## Supplemental references

- [S1] Lopes, L.E., Frank, E.T., Kárpáti, Z., Schmitt, T., and Kronauer, D.J.C. (2023). The alarm pheromone and alarm response of the clonal raider ant. *J. Chem. Ecol.* 49, 1-10. <https://doi.org/10.1007/s10886-023-01407-4>.
- [S2] Moser, J.C., Brownlee, R.C., and Silverstein, R. (1968). Alarm pheromones of the ant *Atta texana*. *J. Insect Physiol.* 14, 529-535. [https://doi.org/10.1016/0022-1910\(68\)90068-1](https://doi.org/10.1016/0022-1910(68)90068-1).
- [S3] McGurk, D.J., Frost, J., Eisenbraun, E.J., Vick, K., Drew, W.A., and Young, J. (1966). Volatile compounds in ants: identification of 4-methyl-3-heptanone from *Pogonomyrmex* ants. *J. Insect Physiol.* 12, 1435–1441. [https://doi.org/10.1016/0022-1910\(66\)90157-0](https://doi.org/10.1016/0022-1910(66)90157-0).
- [S4] Duffield, R.M., and Blum, M.S. (1973). 4-Methyl-3-Heptanone: identification and function in *Neoponera villosa* (Hymenoptera: Formicidae). *Ann. Entomol. Soc. Am.* 66, 1357. <https://doi.org/10.1093/aesa/66.6.1357>.
- [S5] Blum, M.S., and Brand, J.M. (1972). Social insect pheromones: their chemistry and function. *Integr. Comp. Biol.* 12, 553–576. <https://doi.org/10.1093/icb/12.3.553>.
- [S6] Hughes, W.O.H., Howse, P.E., Vilela, E.F., and Goulson, D. (2001). The response of grass-cutting ants to natural and synthetic versions of their alarm pheromone. *Physiol. Entomol.* 26, 165–172. <https://doi.org/10.1046/j.1365-3032.2001.00230.x>.
- [S7] Lalor, P.F., and Hughes, W.O.H. (2011). Alarm behaviour in *Eciton* army ants. *Physiol. Entomol.* 36, 1–7. <https://doi.org/10.1111/j.1365-3032.2010.00749.x>.
- [S8] McGurk, D.J. (1968). I. Studies of volatile compounds from ants II. Degradation studies and structure proof of cis, cis-nepetalactone. Oklahoma State University.

- [S9] Bento, J.M.S., Della Lucia, T.M.C., do Nascimento, R.R., Bergmann, J., and Morgan, E.D. (2007). Response of workers of *Atta sexdens rubropilosa* (Hymenoptera: Formicidae) to mandibular gland compounds of virgin males and females. *Physiol. Entomol.* 32, 283–286. <https://doi.org/10.1111/j.1365-3032.2007.00570.x>.
- [S10] Blum, S., and Hermann, H.R. (1978). Venoms and venom apparatuses of the Formicidae: Dolichoderinae and Aneuretinae. In *Arthropod Venoms: Handbook of Experimental Pharmacology*, S. Bettini, ed. (Berlin, Heidelberg: Springer Berlin Heidelberg), pp. 871–894.
- [S11] do Nascimento, R.R., Billen, J., and Morgan, E.D. (1993). The exocrine secretions of the jumping ant *Harpegnathos saltator*. *Comp. Biochem. Physiol.* 104B, 505–508. [https://doi.org/10.1016/0305-0491\(93\)90274-9](https://doi.org/10.1016/0305-0491(93)90274-9).
- [S12] Morgan, E.D., Jackson, B.D., Keegans, S.J., Nicholls, D.J., Ali, M.F., and Cammaerts, R. (1992). Alkanols in the mandibular gland secretion of the ant *Tetramorium caespitum*. *Belg. J. Zool.* 122, 69–74. ISSN: 0777-6276.
- [S13] Pasteels, J.M., Verhaeghe, J.C., Braekman, J.C., Dalozé, D., and Tursch, B. (1980). Caste-dependent pheromones in the head of the ant *Tetramorium caespitum*. *J. Chem. Ecol.* 6, 467–472. <https://doi.org/10.1007/BF01402923>.
- [S14] Pasteels, J.M., Verhaeghe, J.C., Ottinger, R., Braekman, J.C., and Dalozé, D. (1981). Absolute configuration of (3R,4S)-4-methyl-3-hexanol- A pheromone from the head of the ant *Tetramorium impurum foerster*. *Insect Biochem.* 11, 675–678. [https://doi.org/10.1016/0020-1790\(81\)90057-3](https://doi.org/10.1016/0020-1790(81)90057-3).
- [S15] Duffield, R.M., Brand, J.M., and Blum, M.S. (1977). 6-methyl-5-hepten-2-one in *Formica* species: identification and function as an alarm pheromone (Hymenoptera:

Formicidae). *Ann. Entomol. Soc. Am.* 70, 309–310.

<https://doi.org/10.1093/aesa/70.3.309>.

- [S16] Han, S., Chen, W., and Elgar, M.A. (2022). An ambiguous function of an alarm pheromone in the collective displays of the Australian meat ant, *Iridomyrmex purpureus*. *Ethology* 128, 70–76. <https://doi.org/10.1111/eth.13241>.
- [S17] Oldham, N.J., Morgan, E.D., Gobin, B., Schoeters, E., and Billen, J. (1994). Volatile secretions of old world army ant *Aenictus rotundatus* and chemotaxonomic implications of army ant dufour gland chemistry. *J. Chem. Ecol.* 20, 3297–3305. <https://doi.org/10.1007/BF02033727>.
- [S18] Keegans, S.J., Billen, J., Morgan, D.E., and Gökçen, O.A. (1993). Volatile glandular secretions of three species of new world army ants, *Eciton burchelli*, *Labidus coecus*, and *Labidus praedator*. *J. Chem. Ecol.* 19, 2705–2719. <https://doi.org/10.1007/BF00980702>.
- [S19] Bernardi, R., Cardani, C., Ghiringelli, D., Selva, A., Baggini, A., and Pavan, M. (1967). On the components of secretion of mandibular glands of the ant *Lasius (Dendrolasius) fuliginosus*. *Tetrahedron Lett.* 40, 3893–3896. [https://doi.org/10.1016/S0040-4039\(01\)89747-1](https://doi.org/10.1016/S0040-4039(01)89747-1).
- [S20] US EPA (2022). Estimation Programs Interface Suite™ for Microsoft® Windows, v 4.11. Washington, D.C.: United States Environmental Protection Agency.
- [S21] Li, K. (2008). The image stabilizer plugin for ImageJ. [http://www.cs.cmu.edu/~kangli/code/Image\\_Stabilizer.html](http://www.cs.cmu.edu/~kangli/code/Image_Stabilizer.html).
